# Supplementary material
Source: publisher figshare collection journal article supplement (https://sage.figshare.com/ndownloader/files/15473186)
Supplement: Supplementary file 1 [file 15473186]

**Table 1: Questions asking to measure the comprehensive knowledge and perception on health consequences of smoking**

| <b>1. Knowledge about diseases caused by active and second-hand smoking</b>                                                                                                                                     |                                                               |                            |
|-----------------------------------------------------------------------------------------------------------------------------------------------------------------------------------------------------------------|---------------------------------------------------------------|----------------------------|
| Based on what you know or believe, <b><u>which types of smoking can cause the following diseases (please circle yes or no for each question)</u></b>                                                            | <i>Active smoking</i>                                         | <i>Second-hand smoking</i> |
| Q1. Serious illness? If yes, which are they?                                                                                                                                                                    | <i>Yes/no</i>                                                 | <i>Yes/no</i>              |
| Q2.Lung cancer[19]?                                                                                                                                                                                             | <i>Yes/no</i>                                                 | <i>Yes/no</i>              |
| Q3.Other cancer[20]?                                                                                                                                                                                            | <i>Yes/no</i>                                                 | <i>Yes/no</i>              |
| Q4.Heart diseases (heart attack, stroke, hypertension) [21]?                                                                                                                                                    | <i>Yes/no</i>                                                 | <i>Yes/no</i>              |
| Q5. Other disease? If yes, which are they?                                                                                                                                                                      | <i>Yes/no</i>                                                 | <i>Yes/no</i>              |
| Q6. Chronic diseases or fertility problems for adults (teeth or gums problems; cataracts, type 2 diabetes mellitus, decreased immune function, rheumatoid arthritis, infertility, miscarriage, preterm delivery | <i>Yes/no</i>                                                 | <i>Yes/no</i>              |
| Q7. Affect baby's health before and after birth (Low birth weight' Sudden infant death syndrome, more frequent and severe asthma attacks, respiratory infections, ear infection in children)                    | <i>Yes/no</i>                                                 | <i>Yes/no</i>              |
| <b>2. Perception on the harm of some cigarettes brands and electronic cigarettes</b>                                                                                                                            |                                                               |                            |
| Q8. Do you think that, in comparison with that regular cigarette, the light or mild or low tar cigarette is:<br><br>a. More harmful<br>b. Equally harmful<br>c. Less harmful<br>d. Do not know                  | Perception was calculated by percentage of each option answer |                            |
| Q9. Do you think that, in comparison with the regular cigarette, the electronic cigarette is<br><br>a. Less harmful<br>b. Equally harmful<br>c. More harmful<br>d. Do not know                                  | Perception was calculated by percentage of each option answer |                            |

**Table2: Distribution of adult  $\geq 15$  years by selected demographic characteristics-  
Vietnam GATS, 2015**

| Demographic characteristics     | Weighted              |                                   | Unweight<br>number of<br>adults |
|---------------------------------|-----------------------|-----------------------------------|---------------------------------|
|                                 | Percentage<br>(95%CI) | Number of adult<br>(in thousands) |                                 |
| <b>Overall</b>                  | 100                   | 69,259.6                          | 8,996                           |
| <b><i>Smoking status</i></b>    |                       |                                   |                                 |
| Current smoke                   | 22.5 (21.3-23.8)      | 15,602.4                          | 1,972                           |
| Current non smoke               | 77.5 (76.2-78.7)      | 53,657.2                          | 7,024                           |
| <b><i>Education</i></b>         |                       |                                   |                                 |
| Primary education               | 37.2 (35.2-39.2)      | 25,747.3                          | 3,540                           |
| Lower secondary                 | 30.7 (29.2-32.2)      | 21,219.6                          | 2,528                           |
| Upper secondary                 | 16.9 (15.8-18.1)      | 11,720.2                          | 1,434                           |
| College or above                | 15.2 (14.1-16.3)      | 10,509.0                          | 1,485                           |
| <b><i>Employment status</i></b> |                       |                                   |                                 |
| Employed (gov/non-gov)          | 19.4 (18.2-20.8)      | 13,468.4                          | 1,672                           |
| Self-employed                   | 54.2 (52.5-55.8)      | 37,515.4                          | 4,801                           |
| Student                         | 8.6 (7.6-9.6)         | 5,946.4                           | 468                             |
| Homemaker                       | 7.1 (6.4-7.8)         | 4,889.1                           | 721                             |
| Retired                         | 3.8 (3.3-4.3)         | 2,625.8                           | 559                             |
| Unemployed                      | 7.0 (6.3-7.7)         | 4,814.7                           | 775                             |
| <b><i>Marital status</i></b>    |                       |                                   |                                 |
| Single/Divorced/<br>Widow       | 30.8 (29.4-32.2)      | 21,296.4                          | 2,499                           |
| Currently married               | 69.2 (67.8-70.6)      | 47,883.9                          | 6,483                           |
| <b><i>Age</i></b>               |                       |                                   |                                 |
| 15-24                           | 21.1 (19.8-22.6)      | 14,646.7                          | 1,044                           |
| 24-34                           | 21.2 (20.1-22.3)      | 14,665.9                          | 1,580                           |
| 35-44                           | 20.7 (19.7-21.8)      | 14,328.6                          | 1,854                           |
| 45-54                           | 16.3 (15.4-17.2)      | 11,277.0                          | 1,912                           |

|                                                             |                  |          |       |
|-------------------------------------------------------------|------------------|----------|-------|
| 55-64                                                       | 11.0 (10.3-11.7) | 7,607.5  | 1,351 |
| ≥65                                                         | 9.7 (9.0-10.4)   | 6,734.0  | 1,255 |
| <b><i>Gender</i></b>                                        |                  |          |       |
| Male                                                        | 48.5 (47.1-49.9) | 33,562.6 | 3,983 |
| Female                                                      | 51.5 (50.1-52.9) | 35,697.0 | 5,013 |
| <b><i>Household's Wealth Index</i></b>                      |                  |          |       |
| 1st quintile (Poorest)                                      | 20.1 (18.1-22.2) | 13,888.1 | 1,883 |
| 2nd quintile                                                | 23.6 (22.2-25.1) | 16,376.8 | 2,088 |
| 3rd quintile                                                | 16.8 (15.6-18.0) | 11,627.4 | 1,413 |
| 4th quintile                                                | 19.5 (18.2-20.9) | 13,530.8 | 1,758 |
| 5th quintile (Richest)                                      | 20.0 (18.5-21.5) | 13,836.5 | 1,854 |
| <b><i>Regulation of not allow smoking in family</i></b>     |                  |          |       |
| No                                                          | 84.0 (82.7-85.2) | 58,180.1 | 7,344 |
| Yes                                                         | 16.0 (14.8-17.3) | 11,065.5 | 1,649 |
| <b><i>Residence</i></b>                                     |                  |          |       |
| Urban                                                       | 33.8 (32.9-34.7) | 23,395.3 | 4,421 |
| Rural                                                       | 66.2 (65.3-67.1) | 45,864.3 | 4,575 |
| <b><i>Ethnicity</i></b>                                     |                  |          |       |
| Kinh                                                        | 84.7 (82.2-87.0) | 58,679.3 | 7,729 |
| Others                                                      | 15.3 (13.5-17.8) | 10,580.3 | 1,267 |
| <b><i>Have consultation of quitting smoking</i></b>         |                  |          |       |
| No                                                          | 97.3 (96.9-97.6) | 67,375.0 | 8,729 |
| Yes                                                         | 2.7 (2.4-3.1)    | 1,884.6  | 267   |
| <b><i>Regulation of not allow smoking in work place</i></b> |                  |          |       |
| No                                                          | 85.2 (84.0-86.4) | 59,039.9 | 7,704 |
| Yes                                                         | 14.8 (13.6-16.0) | 10,219.7 | 1,292 |
| <b><i>Access to positive information</i></b>                |                  |          |       |

|                                               |                  |          |       |
|-----------------------------------------------|------------------|----------|-------|
| <i>channel</i>                                |                  |          |       |
| No                                            | 8.7 (7.8-9.7)    | 6,040.8  | 879   |
| Yes                                           | 91.3 (90.3-92.2) | 63,218.9 | 8,117 |
| <i>Access to negative information channel</i> |                  |          |       |
| No                                            | 83.4 (82.1-84.6) | 57,744.0 | 7576  |
| Yes                                           | 16.6 (15.4-17.9) | 11,515.6 | 1420  |
